# Supplementary material for: Genetic heterogeneity of the Spy1336/R28—Spy1337 virulence axis in Streptococcus pyogenes and effect on gene transcript levels and pathogenesis
Source: PubMed Central journal article supplement (PMC7098570; doi:10.1371/journal.pone.0229064), 2020-03-26
Supplement: pone.0229064.s001.pdf [file pone.0229064.s001.pdf]

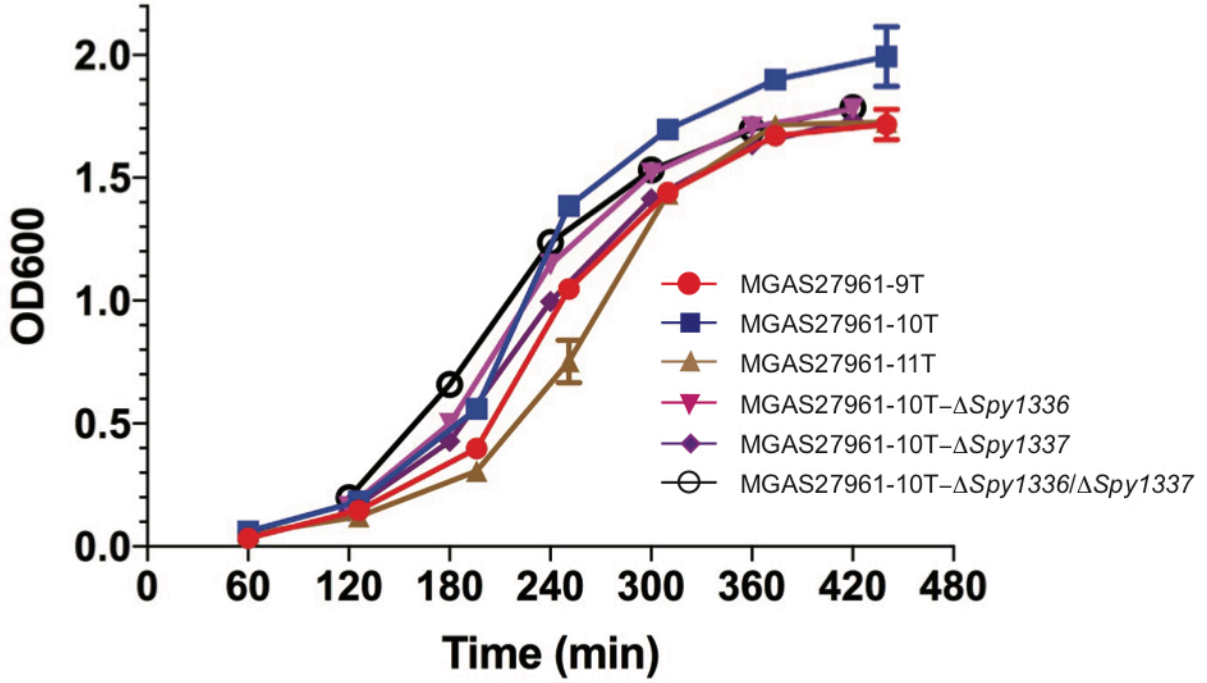

**Supplementary Figure 1. Growth curves of isogenic mutants in THY.** Strains were grown at 37°C in THY medium.
