# Supplementary material for: Genetic heterogeneity of the Spy1336/R28—Spy1337 virulence axis in Streptococcus pyogenes and effect on gene transcript levels and pathogenesis
Source: PubMed Central journal article supplement (PMC7098570; doi:10.1371/journal.pone.0229064), 2020-03-26
Supplement: pone.0229064.s002.pdf [file pone.0229064.s002.pdf]

### A. Number of differentially expressed genes

|               | 10T vs 9T <sup>(1)</sup> |                  | 11T vs 9T <sup>(2)</sup> |      | 11T vs 10T <sup>(3)</sup> |      | Growth phase |
|---------------|--------------------------|------------------|--------------------------|------|---------------------------|------|--------------|
|               | Number of genes          | % <sup>(4)</sup> | Number of genes          | %    | Number of genes           | %    |              |
| Upregulated   | 18                       | 1%               | 59                       | 3.2% | 8                         | 0.4% | ME           |
| Downregulated | 13                       | 0.7%             | 28                       | 1.5% | 7                         | 0.4% |              |
| Upregulated   | 102                      | 5.6%             | 12                       | 0.7% | 8                         | 0.4% | ES           |
| Downregulated | 154                      | 8.4%             | 98                       | 5.4% | 5                         | 0.3% |              |

(1) MGAS2761-10T compared to MGAS2761-9T

(2) MGAS2761-11T compared to MGAS2761-9T

(3) MGAS2761-11T compared to MGAS2761-10T

(4) Percentage of genes compared to the entire genome

### B. Upregulated virulence genes (10T vs 9T)

|    | Growth | Spy     | gene           | Product                                | FC   |
|----|--------|---------|----------------|----------------------------------------|------|
| 1  | ME     | Spy0137 | <i>nga</i>     | NAD glycohydrolase                     | 1.5  |
| 2  | ME     | Spy0138 | <i>ifs</i>     | immunity factor for SPN                | 1.6  |
| 3  | ME     | Spy0139 | <i>slo</i>     | streptolysin O                         | 1.6  |
| 4  | ME     | Spy0540 | <i>sagA</i>    | streptolysin S precursor               | 1.6  |
| 5  | ME     | Spy1336 | <i>Spy1336</i> | R28 protein                            | 64.7 |
| 6  | ME     | Spy1337 | <i>Spy1337</i> | transcriptional regulator, AraC family | 4.3  |
| 7  | ME     | Spy1675 | <i>sclA</i>    | collagen-like surface protein A        | 2.4  |
| 8  | ME     | Spy1699 | -              | cell surface protein                   | 1.6  |
| 9  | ME     | Spy1700 | <i>scpA</i>    | CSA peptidase precursor                | 1.7  |
| 10 | ME     | Spy1701 | <i>enn</i>     | enn protein                            | 1.5  |
| 11 | ME     | Spy1702 | <i>emm</i>     | emm28 protein                          | 1.7  |
| 1  | ST     | Spy0138 | <i>ifs</i>     | immunity factor for SPN                | 1.6  |
| 2  | ST     | Spy0139 | <i>slo</i>     | streptolysin O                         | 1.5  |
| 3  | ST     | Spy1336 | <i>Spy1336</i> | R28 protein                            | 45.3 |
| 4  | ST     | Spy1337 | <i>Spy1337</i> | transcriptional regulator, AraC family | 7.6  |

### C. Upregulated virulence genes (11T vs 9T)

|    | Growth | Spy     | gene           | Product                                       | FC    |
|----|--------|---------|----------------|-----------------------------------------------|-------|
| 1  | ME     | Spy0137 | <i>nga</i>     | NAD glycohydrolase                            | 1.8   |
| 2  | ME     | Spy0138 | <i>ifs</i>     | immunity factor for SPN                       | 2.0   |
| 3  | ME     | Spy0139 | <i>slo</i>     | streptolysin O                                | 1.9   |
| 4  | ME     | Spy0329 | <i>spyCEP</i>  | lactocepin                                    | 2.9   |
| 5  | ME     | Spy0540 | <i>sagA</i>    | streptolysin S precursor                      | 1.7   |
| 6  | ME     | Spy0541 | <i>sagB</i>    | streptolysin S biosynthesis protein           | 1.6   |
| 7  | ME     | Spy0542 | <i>sagC</i>    | streptolysin S biosynthesis protein           | 1.6   |
| 8  | ME     | Spy0543 | <i>sagD</i>    | streptolysin S biosynthesis protein           | 1.7   |
| 9  | ME     | Spy0544 | <i>sagE</i>    | streptolysin S putative self-immunity protein | 1.8   |
| 10 | ME     | Spy0545 | <i>sagF</i>    | streptolysin S biosynthesis protein           | 1.7   |
| 11 | ME     | Spy0546 | <i>sagG</i>    | streptolysin S export ATP-binding protein     | 1.8   |
| 12 | ME     | Spy0547 | <i>sagH</i>    | streptolysin S export transmembrane protein   | 1.7   |
| 13 | ME     | Spy0548 | <i>sagI</i>    | streptolysin S export transmembrane protein   | 1.8   |
| 14 | ME     | Spy1336 | <i>Spy1336</i> | R28 protein                                   | 115.0 |
| 15 | ME     | Spy1337 | <i>Spy1337</i> | transcriptional regulator, AraC family        | 6.0   |
| 16 | ME     | Spy1675 | <i>sclA</i>    | collagen-like surface protein A               | 3.7   |
| 17 | ME     | Spy1699 | -              | cell surface protein                          | 2.1   |
| 18 | ME     | Spy1700 | <i>scpA</i>    | CSA peptidase precursor                       | 2.2   |
| 19 | ME     | Spy1701 | <i>enn</i>     | enn protein                                   | 1.9   |
| 20 | ME     | Spy1702 | <i>emm</i>     | emm28 protein                                 | 1.9   |
| 1  | ST     | Spy0137 | <i>nga</i>     | NAD glycohydrolase                            | 1.9   |
| 2  | ST     | Spy0138 | <i>ifs</i>     | immunity factor for SPN                       | 1.8   |
| 3  | ST     | Spy0139 | <i>slo</i>     | streptolysin O                                | 1.7   |
| 4  | ST     | Spy1336 | <i>Spy1336</i> | R28 protein                                   | 72.6  |
| 5  | ST     | Spy1337 | <i>Spy1337</i> | transcriptional regulator, AraC family        | 9.1   |
| 6  | ST     | Spy1702 | <i>emm</i>     | emm28 protein                                 | 2.3   |
| 7  | ST     | Spy1716 | <i>saf</i>     | serum opacity factor                          | 1.5   |

### D. Upregulated virulence genes (10T vs 11T)

|   | Growth | Spy     | gene           | Product                         | FC  |
|---|--------|---------|----------------|---------------------------------|-----|
| 1 | ME     | Spy0329 | <i>spyCEP</i>  | lactocepin                      | 1.5 |
| 2 | ME     | Spy1336 | <i>Spy1336</i> | R28 protein                     | 1.8 |
| 1 | ST     | Spy1336 | <i>Spy1336</i> | R28 protein                     | 1.6 |
| 2 | ST     | Spy1675 | <i>sclA</i>    | collagen-like surface protein A | 1.7 |
| 3 | ST     | Spy1702 | <i>emm</i>     | emm28 protein                   | 1.7 |
| 4 | ST     | Spy1621 | <i>salA</i>    | lantibiotic salivaricin A       | 1.8 |

## Supplementary Figure 2. RNA-seq results comparing isogenic 9T, 10T, and 11T

strains. (A) Total number of differentially expressed genes using a fold cutoff  $\geq 1.5$ .

Upregulated virulence genes comparing 9T vs 10T (B), 9T vs 11T (C), and 10T vs 11T

(D).
