# Supplementary material for: Genetic heterogeneity of the Spy1336/R28—Spy1337 virulence axis in Streptococcus pyogenes and effect on gene transcript levels and pathogenesis
Source: PubMed Central journal article supplement (PMC7098570; doi:10.1371/journal.pone.0229064), 2020-03-26
Supplement: pone.0229064.s003.pdf [file pone.0229064.s003.pdf]

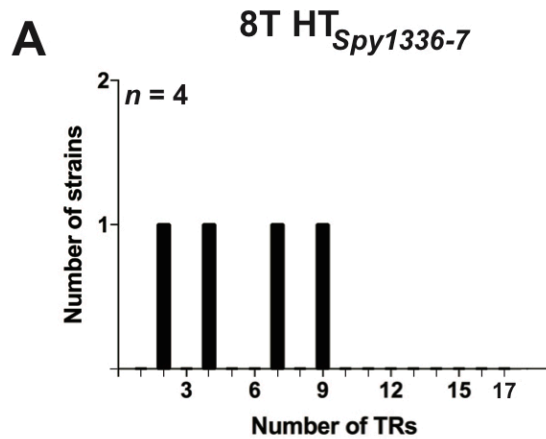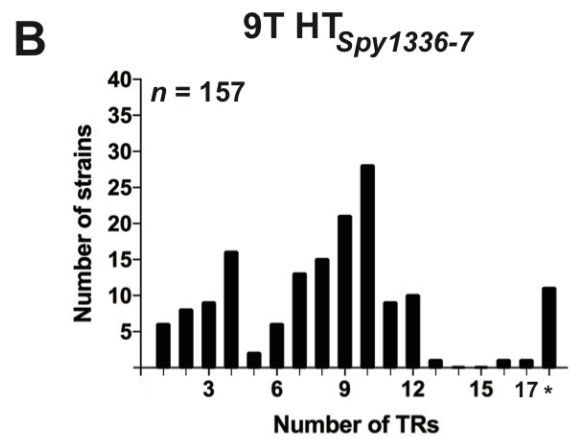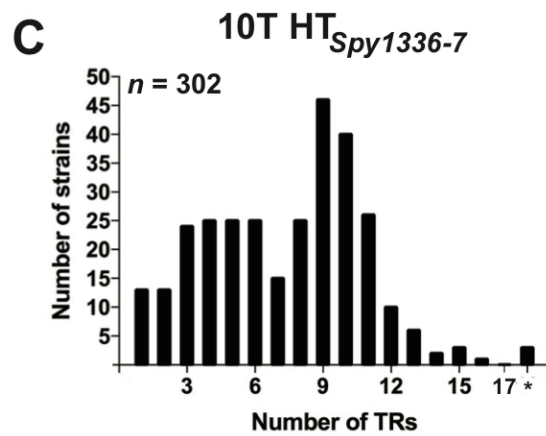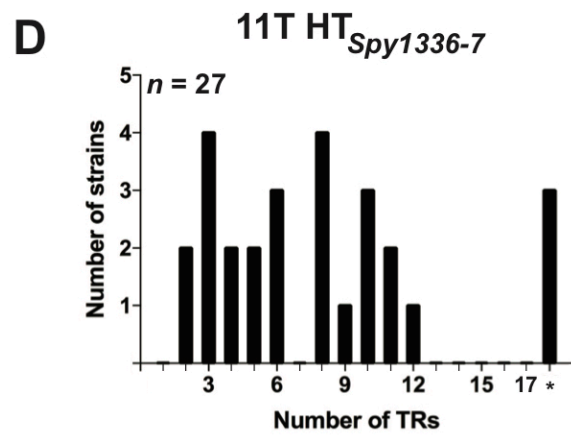

\*, Not determined

The total number of strains is  $n = 490$ . Of the original 493 strains 2 have no RD2 and 1 has 13 Ts

**Supplementary Figure 3. Correlation between the number of TR<sub>R28</sub> repeats in *Spy1336/R28* and the number of T nucleotides in the corresponding HT<sub>Spy1336-07</sub>.**  
 Number of TR<sub>R28</sub> repeats in strains with HT<sub>Spy1336-7</sub> containing 8Ts (**A**), 9Ts (**B**), 10Ts (**C**), and 11Ts (**D**).  $n=490$  strains.
