# Supplementary material for: Genetic heterogeneity of the Spy1336/R28—Spy1337 virulence axis in Streptococcus pyogenes and effect on gene transcript levels and pathogenesis
Source: PubMed Central journal article supplement (PMC7098570; doi:10.1371/journal.pone.0229064), 2020-03-26
Supplement: pone.0229064.s004.pdf [file pone.0229064.s004.pdf]

**Figure 2C original image**

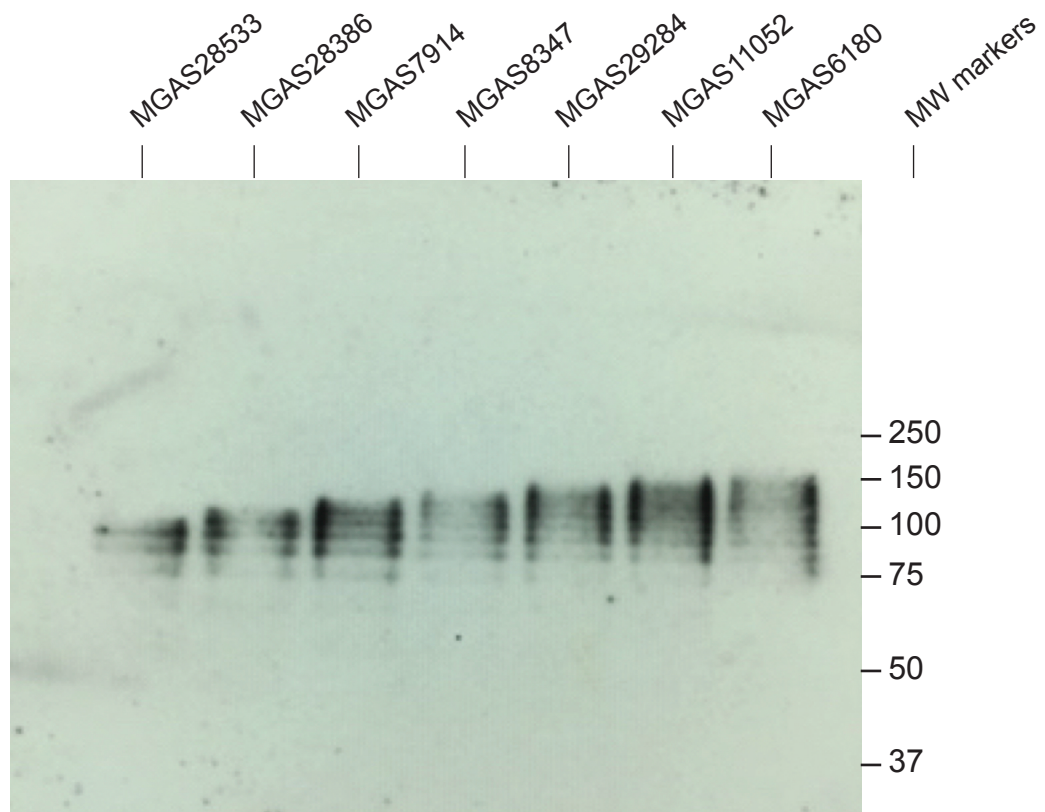

MW: Molecular weight

Original picture of a Kodak film placed on a transilluminator was taken using an iphone

Figure 6A original image

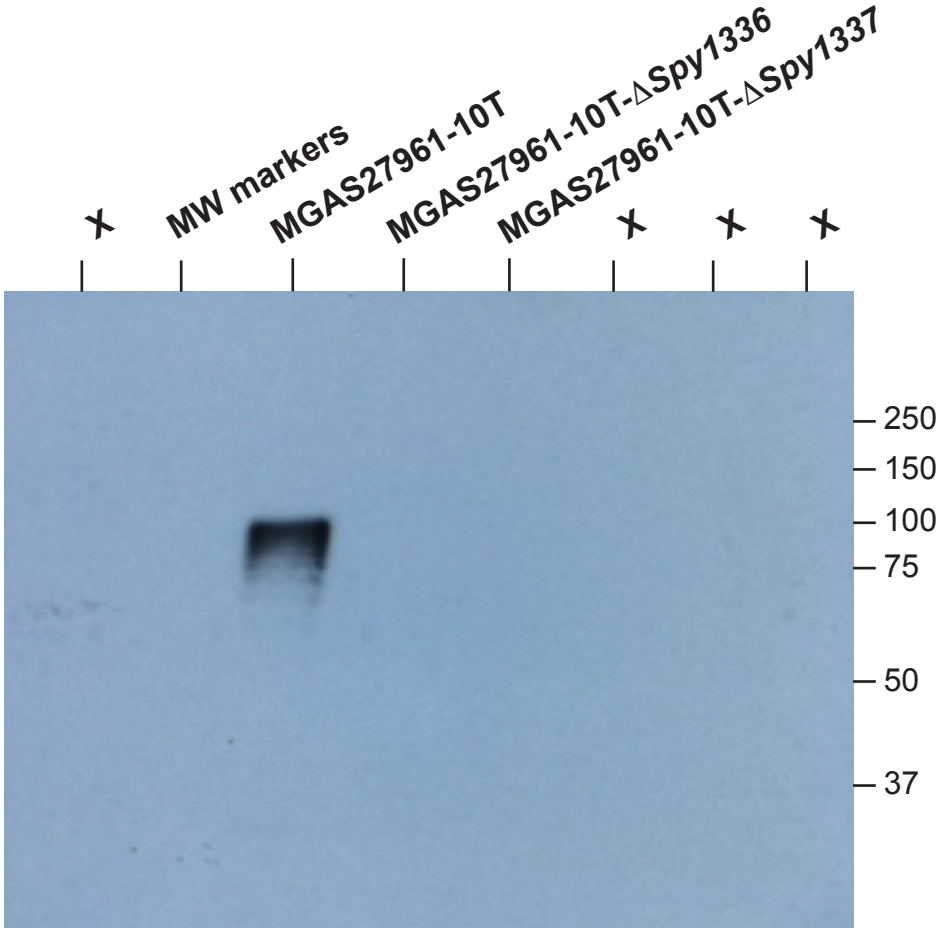

MW: Molecular weight

Original picture of a Kodak film placed on a transilluminator was taken using an iphone

Figure 6B original image

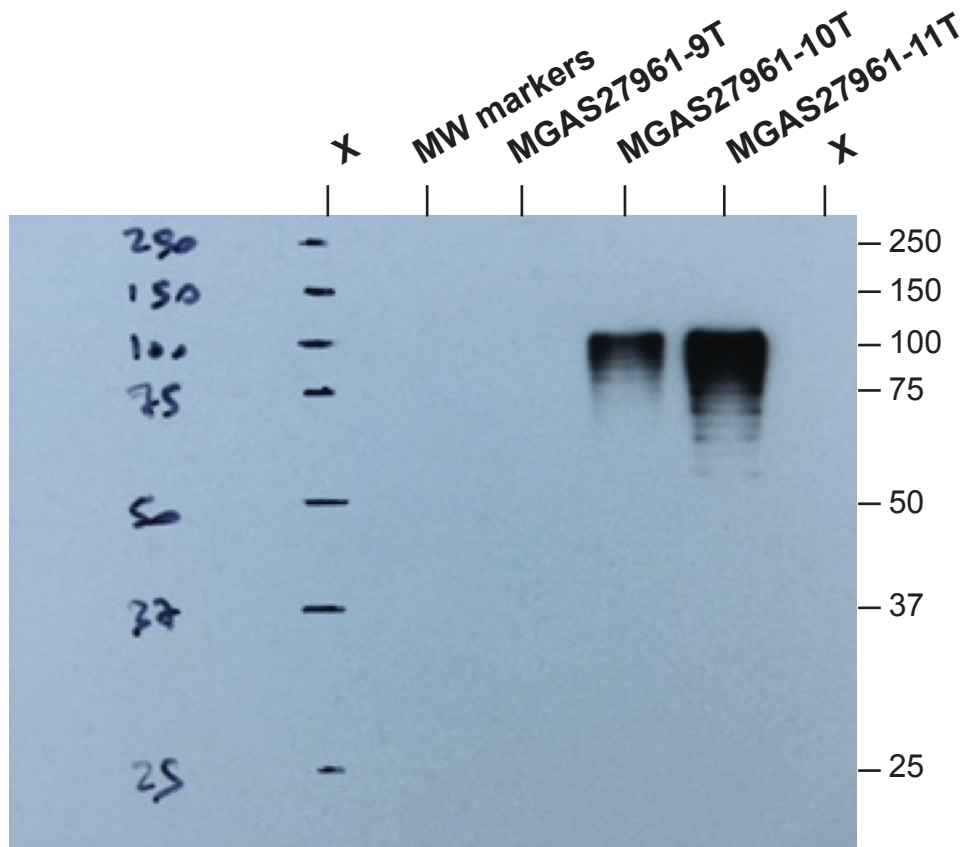

MW: Molecular weight

Original picture of a Kodak film placed on a transilluminator was taken using an iphone
